# Supplementary material
Source: MDPI journal article supplement (https://www.mdpi.com/2075-4701/12/8/1380)
Supplement: s1 [file s1]

Article

# Study of the Printability, Microstructures, and Mechanical Performances of Laser Powder Bed Fusion Built Haynes 230

Ziheng Wu <sup>\*,†</sup>, Srujana Rao Yarasi, Junwon Seo, Nicholas Lamprinakos and Anthony D. Rollett <sup>\*</sup>

Department of Materials Science & Engineering, Carnegie Mellon University, 5000 Forbes Ave, Pittsburgh, PA 15213, USA

<sup>\*</sup> Correspondence: wu57@llnl.gov (Z.W.); rollett@andrew.cmu.edu (A.D.R.);

Tel.: +1-765-418-5254 (Z.W.); +1-412-268-3177 (A.D.R.)

<sup>†</sup> Current affiliation: Materials Engineering Division, Lawrence Livermore National Laboratory, 7000 East Ave, Livermore, CA 94550, USA.

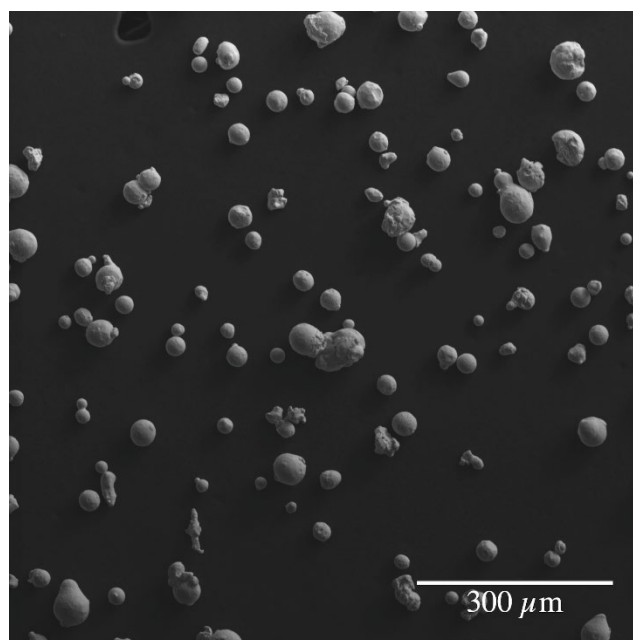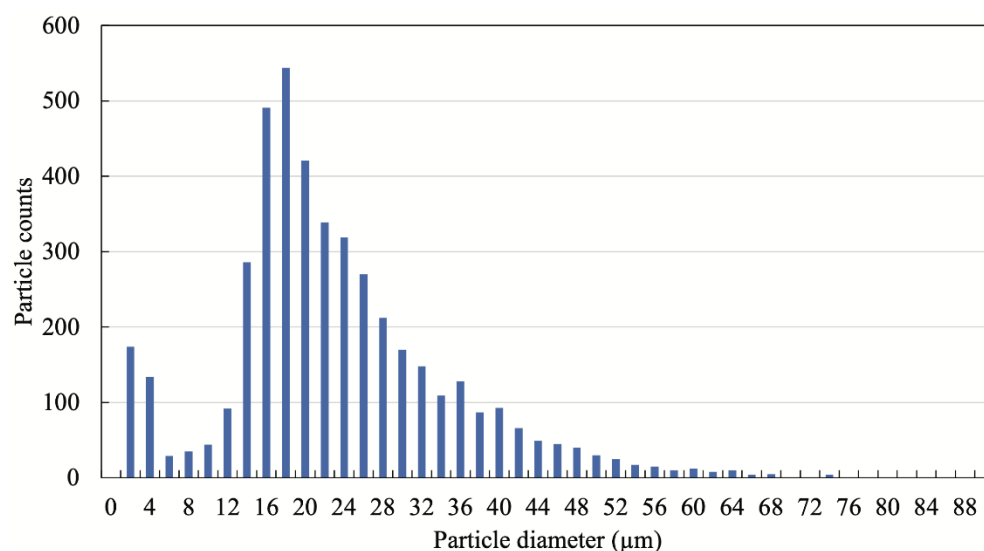

**Figure S1.** A SEM image and the corresponding size distribution of the H230 powder feedstock.

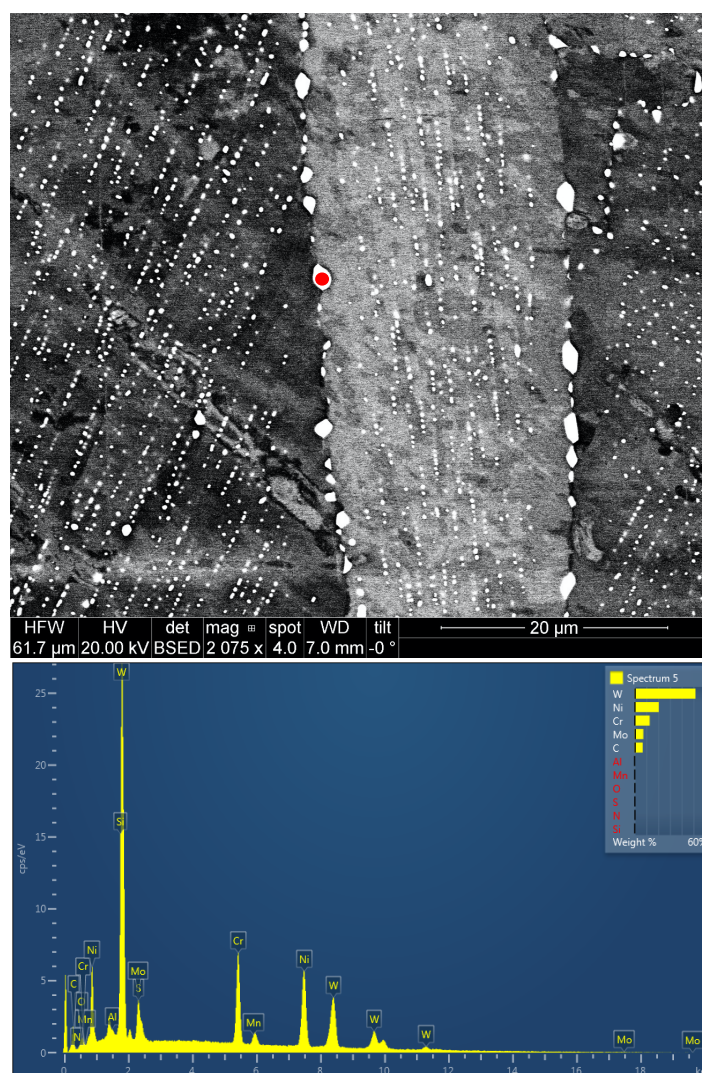

**Figure S2.** A SEM image and the corresponding EDS spectrum of a grain boundary carbide in a L-PBF-built H230 specimen annealed at 1200°C for 2 hours followed by water quench. The red dot highlights the location where the EDS spectrum was acquired.

**Table S1.** H230 material properties [2] used in the finite element stress simulations.

|                                               |           |
|-----------------------------------------------|-----------|
| Thermal Expansion Coefficient ( $K^{-1}$ )    | 0.0000118 |
| Elastic Modulus (GPa)                         | 209       |
| Poisson Ratio                                 | 0.31      |
| Material Yield Strength (MPa)                 | 383       |
| Hardening Factor                              | 0.0041    |
| Support Yield Strength Ratio                  | 0.4375    |
| Strain Scaling Factor                         | 1         |
| Anisotropic Strain Coefficient (Longitudinal) | 1.5       |
| Anisotropic Strain Coefficient (Transverse)   | 0.5       |
| Anisotropic Strain Coefficient (Depth)        | 1         |
| Purging Gas Convection Coefficient            | 12.5      |
| Powder Packing Density Ratio                  | 0.6       |

**Table S2.** The raster process parameters of the testing coupons and the corresponding porosity contents. Note that all specimens share the same contour parameters. The marker ‘x’ indicates a failed part due to excessive energy input and extreme scanning velocity. The parameters for the mechanical coupons are highlighted in **bold**.

| Sample # | Pre-heat           | Power (W)  | Velocity (mm/s) | Hatch (mm)  | Energy Density (J/mm <sup>3</sup> ) | Porosity (%) |
|----------|--------------------|------------|-----------------|-------------|-------------------------------------|--------------|
| L1/H1    | 80°C/200°C         | 285        | 700             | 0.11        | 92.53                               | 0.55/0.17    |
| L2/H2    | 80°C/ <b>200°C</b> | <b>330</b> | <b>700</b>      | <b>0.11</b> | 107.14                              | 0.18/0.10    |
| L3/H3    | 80°C/200°C         | 370        | 700             | 0.11        | 120.13                              | 0.23/0.17    |
| L4/H4    | 80°C/200°C         | 285        | 960             | 0.11        | 67.47                               | 0.62/0.06    |
| L5/H5    | 80°C/200°C         | 330        | 960             | 0.11        | 78.13                               | 0.34/0.07    |
| L6/H6    | 80°C/200°C         | 370        | 960             | 0.11        | 87.59                               | 0.29/0.10    |
| H7       | 200°C              | 285        | 400             | 0.11        | 161.93                              | 1.85         |
| H8       | 200°C              | 330        | 400             | 0.11        | 187.50                              | 2.04         |
| H9       | 200°C              | 170        | 700             | 0.05        | 121.43                              | 0.10         |
| H10      | 200°C              | 220        | 700             | 0.05        | 157.14                              | 0.17         |
| H11      | 200°C              | 170        | 960             | 0.05        | 88.54                               | 0.04         |
| H12      | 200°C              | 220        | 960             | 0.05        | 114.58                              | 0.03         |
| H13      | 200°C              | 220        | 1300            | 0.05        | 84.62                               | 0.04         |
| H14      | 200°C              | 285        | 1300            | 0.05        | 109.62                              | 0.30         |
| H15      | 200°C              | 330        | 1300            | 0.05        | 126.92                              | x            |
| H16      | 200°C              | 370        | 1300            | 0.05        | 142.31                              | x            |
| H17      | 200°C              | 285        | 1600            | 0.05        | 89.06                               | 0.05         |
| H18      | 200°C              | 330        | 1600            | 0.05        | 103.13                              | x            |
| H19      | 200°C              | 370        | 1600            | 0.05        | 115.63                              | x            |
| H20      | 200°C              | 330        | 1900            | 0.05        | 86.84                               | 0.08         |
| H21      | 200°C              | 370        | 1900            | 0.05        | 97.37                               | x            |
| L7       | 80°C               | 285        | 550             | 0.11        | 117.77                              | 0.42         |
| L8       | 80°C               | 330        | 550             | 0.11        | 136.36                              | 0.68         |
| L9       | 80°C               | 370        | 550             | 0.11        | 152.89                              | 0.77         |
| L10      | 80°C               | 70         | 250             | 0.11        | 63.64                               | 1.55         |
| L11      | 80°C               | 100        | 350             | 0.11        | 64.94                               | 3.02         |
| L12      | 80°C               | 130        | 450             | 0.11        | 65.66                               | 0.44         |

**Table S3.** Summary of the tensile properties of the L-PBF H230 at the annealing condition (1200°C for 2 hours followed by water quench) and the wrought H230 reported Haynes International, Inc [2].

| Sample                 | Temp. | UTS (MPa)    | 0.2% YS (MPa) | Elongation (%) | RA (%)     | Modulus (GPa) |
|------------------------|-------|--------------|---------------|----------------|------------|---------------|
| T-1                    | Room  | 868.1        | 443.3         | 43             | 52         | 188.9         |
| T-2                    | Room  | 872.9        | 447.5         | 46             | 52         | 184.1         |
| T-3                    | Room  | 857.0        | 442.0         | 39             | 42         | 184.8         |
| T-4                    | Room  | 825.6        | 422.0         | 45             | 51         | 168.9         |
| Average                | Room  | 858.4 ± 16.6 | 438.7 ± 11.4  | 43.3 ± 3.1     | 49.3 ± 4.9 | 181.7         |
| Wrought Haynes 230 [2] | Room  | 852          | 383           | 46             | -          | -             |

**Table S4.** Summary of the tensile properties of the L-PBF H230 at the stress relieved condition (1165°C for 3 hours followed by furnace cool) and the wrought H230 reported Haynes International, Inc [2].

| Sample  | Temp. | UTS (MPa) | 0.2% YS (MPa) | Elongation (%) | RA (%) | Modulus (GPa) |
|---------|-------|-----------|---------------|----------------|--------|---------------|
| Sample1 | Room  | 911.5     | 728.8         | 33             | 29     | 133           |
| Sample2 | Room  | 903.2     | 479.9         | 35             | 31     | 146           |
| Sample3 | Room  | 899.1     | 477.8         | 33             | 36     | 112           |
| Sample4 | Room  | 902.5     | 484.0         | 31             | 29     | 211*          |

|                        |      |             |             |          |      |         |
|------------------------|------|-------------|-------------|----------|------|---------|
| Average                | Room | 904.1 ± 4.6 | 480.6 ± 2.6 | 33 ± 1.4 | 31.3 | 130.3** |
| Wrought Haynes 230 [2] | Room | 852         | 383         | 46       | -    | -       |

\* The extensometer slipped during the experiment. \*\* The average was calculated without sample 4.

**Table S5.** Summary of the creep properties of the L-PBF H230 at the annealing condition (1200°C for 2 hours followed by water quench) and the wrought H230 reported Haynes International, Inc [2] tested at 760°C and 100 MPa.

| Sample #    | Stress (MPa) | Temperature (K) | 0.5% Creep Time (hrs) | 1% Creep Time (hrs) | Rupture Time (hrs)               | Total Creep (%) | Elongation (%) | RA (%) |
|-------------|--------------|-----------------|-----------------------|---------------------|----------------------------------|-----------------|----------------|--------|
| C-L1        | 100          | 1033            | 52.37                 | 209.29              | -                                | 3.504           | -              | -      |
| C-L2        | 100          | 1033            | 317.19                | > 500               | -                                | 0.7287          | -              | -      |
| C-L3        | 100          | 1033            | 157.83                | 448.3               | -                                | 1.115           | -              | -      |
| C-L4        | 100          | 1033            | 244.64                | > 500               | -                                | 0.831           | -              | -      |
| Wrought [2] | 100          | 1033            | 10–100                | > 100               | 10 <sup>3</sup> –10 <sup>4</sup> | -               | -              | -      |

**Table S6.** Summary of the creep properties of the L-PBF H230 at the annealing condition (1200°C for 2 hours followed by water quench) and the wrought H230 reported Haynes International, Inc [2] tested at 816°C and 121 MPa.

| Sample #    | Stress (MPa) | Temperature (K) | 0.5% Creep Time (hrs) | 1% Creep Time (hrs) | Rupture Time (hrs) | Total Creep (%) | Elongation (%) | RA (%) |
|-------------|--------------|-----------------|-----------------------|---------------------|--------------------|-----------------|----------------|--------|
| C-H1        | 121          | 1089            | 2.76                  | 5.88                | 40.7               | 29.9709         | 28.9           | 33.7   |
| C-H2        | 121          | 1089            | 2.84                  | 5.92                | 40.8               | 38.9416         | 42.5           | 37.4   |
| C-H3        | 121          | 1089            | 2.97                  | 5.51                | 35.8               | 32.7338         | 36.8           | 36.5   |
| C-H4        | 121          | 1089            | 1.34                  | 2.59                | 19.9               | 36.0745         | 50             | 38.5   |
| Wrought [2] | 121          | 1089            | < 10                  | < 10                | > 100              | -               | -              | -      |

## References

- 1 Haynes International. HAYNES ® 230 ® alloy, 2021. [https://haynesintl.com/docs/default-source/pdfs/new-alloy-brochures/high-temperature-alloys/brochures/230-brochure.pdf?sfvrsn=ae7229d4\\_86](https://haynesintl.com/docs/default-source/pdfs/new-alloy-brochures/high-temperature-alloys/brochures/230-brochure.pdf?sfvrsn=ae7229d4_86) (accessed on 3 July 2022)
